# Supplementary material for: Synthesis and self-assembly of an acid/reduction co-triggered degradable amphiphilic copolyprodrug as a tumor-selective drug self-delivery system
Source: Royal Society of Chemistry journal article supplement (doi:10.1039/d2tb00150k), 2022-01-01
Supplement: d2tb00150k1.pdf [file d2tb00150k1.pdf]

### Supporting Information

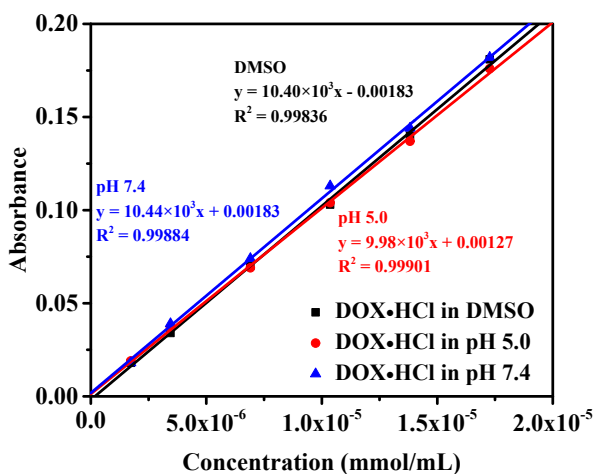

Fig. S1. Calibration curves of DOX·HCl in different solutions.

xiepengwei-01\_210625160103 #19 RT: 0.14 AV: 1 NL: 1.15E6  
T: FTMS + p ESI Full ms [500.00-3000.00]

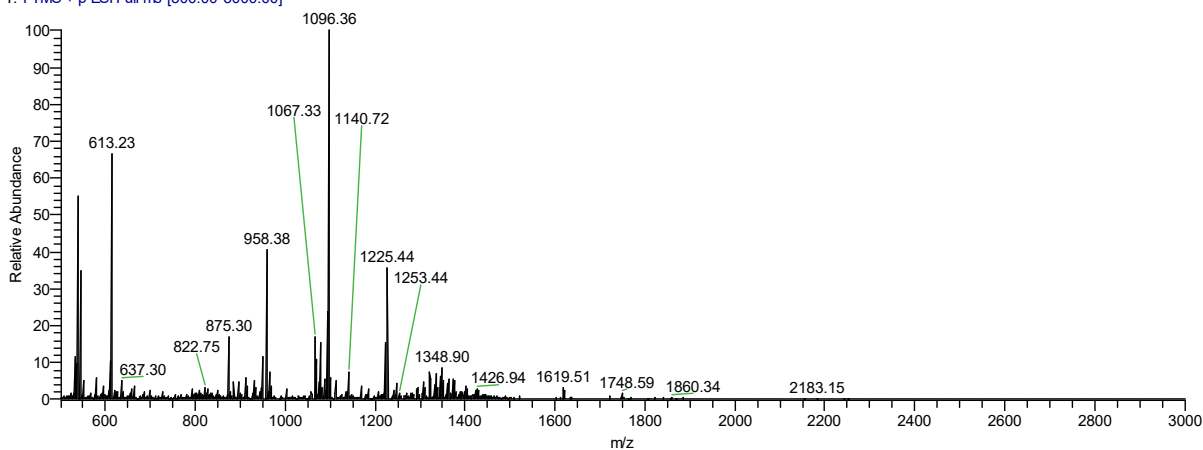

Fig. S2. ESI mass spectrum of D-DOX<sub>ADH</sub>.

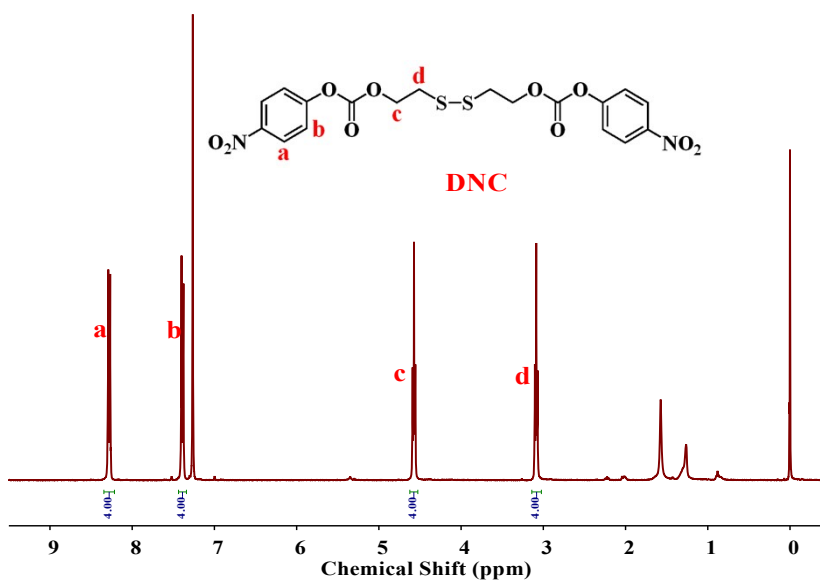

Fig. S3. <sup>1</sup>H NMR spectra of DNC (CDCl<sub>3</sub>, 20 °C).

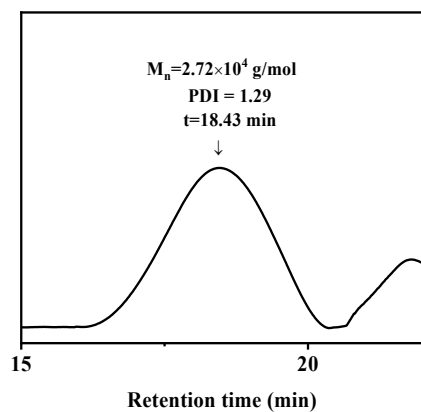

**Fig. S4.** GPC trace of the PDOX<sub>SS-ADH</sub>-PEG in DMF with calibrator of PMMA.

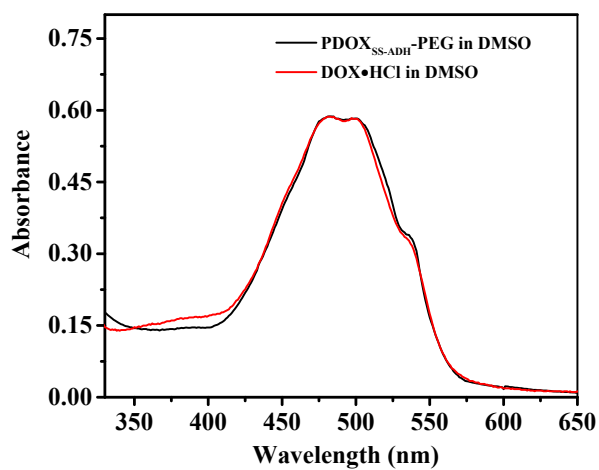

**Fig. S5.** UV-vis spectra of DOX·HCl ( $4.682 \times 10^{-5} \text{ mmol/mL}$ ) and PDOX<sub>SS-ADH</sub>-PEG ( $4.682 \times 10^{-5} \text{ mmol/mL}$ ) in DMSO.
